# Supplementary material for: KCNN4 is a potential prognostic marker and critical factor affecting the immune status of the tumor microenvironment in kidney renal clear cell carcinoma
Source: PubMed Central journal article supplement — Transl Androl Urol. 2021 Jun;10(6):2454–70. doi: 10.21037/tau-21-332 (PMC8261455; doi:10.21037/tau-21-332), 2021-06
Supplement: tau-10-06-2454-coif.pdf [file tau-10-06-2454-coif.pdf]

## ICMJE DISCLOSURE FORM

Date: April 19th, 2021

Your Name: Shaohua Chen

Manuscript Title: KCNN4 is a potential prognostic marker and critical factor affecting the immune status of the tumor microenvironment in kidney renal clear cell carcinoma

Manuscript number (if known): \_\_\_\_\_

In the interest of transparency, we ask you to disclose all relationships/activities/interests listed below that are related to the content of your manuscript. "Related" means any relation with for-profit or not-for-profit third parties whose interests may be affected by the content of the manuscript. Disclosure represents a commitment to transparency and does not necessarily indicate a bias. If you are in doubt about whether to list a relationship/activity/interest, it is preferable that you do so.

The following questions apply to the author's relationships/activities/interests as they relate to the current manuscript only.

The author's relationships/activities/interests should be defined broadly. For example, if your manuscript pertains to the epidemiology of hypertension, you should declare all relationships with manufacturers of antihypertensive medication, even if that medication is not mentioned in the manuscript.

In item #1 below, report all support for the work reported in this manuscript without time limit. For all other items, the time frame for disclosure is the past 36 months.

|                                                           |                                                                                                                                                                                | Name all entities with whom you have this relationship or indicate none (add rows as needed)                                      | Specifications/Comments (e.g., if payments were made to you or to your institution) |
|-----------------------------------------------------------|--------------------------------------------------------------------------------------------------------------------------------------------------------------------------------|-----------------------------------------------------------------------------------------------------------------------------------|-------------------------------------------------------------------------------------|
| <b>Time frame: Since the initial planning of the work</b> |                                                                                                                                                                                |                                                                                                                                   |                                                                                     |
| 1                                                         | All support for the present manuscript (e.g., funding, provision of study materials, medical writing, article processing charges, etc.)<br><b>No time limit for this item.</b> | National Natural Science Foundation of China (grant number 81770759)                                                              |                                                                                     |
|                                                           |                                                                                                                                                                                | National Key Research and Development Program of China (grant number 2017YFC0908000)                                              |                                                                                     |
|                                                           |                                                                                                                                                                                | Major Project of Guangxi Innovation Driven (grant number AA18118016)                                                              |                                                                                     |
|                                                           |                                                                                                                                                                                | Guangxi key Laboratory for Genomic and Personalized Medicine (grant number 16-380-54, 17-259-45, 19-050-22, 19-185-33, 20-065-33) |                                                                                     |
| <b>Time frame: past 36 months</b>                         |                                                                                                                                                                                |                                                                                                                                   |                                                                                     |
| 2                                                         | Grants or contracts from                                                                                                                                                       | <input checked="" type="checkbox"/> None                                                                                          |                                                                                     |

|    |                                                                                                              |                   |  |
|----|--------------------------------------------------------------------------------------------------------------|-------------------|--|
|    | any entity (if not indicated in item #1 above).                                                              |                   |  |
| 3  | Royalties or licenses                                                                                        | <u>  ✓  </u> None |  |
| 4  | Consulting fees                                                                                              | <u>  ✓  </u> None |  |
| 5  | Payment or honoraria for lectures, presentations, speakers bureaus, manuscript writing or educational events | <u>  ✓  </u> None |  |
| 6  | Payment for expert testimony                                                                                 | <u>  ✓  </u> None |  |
| 7  | Support for attending meetings and/or travel                                                                 | <u>  ✓  </u> None |  |
| 8  | Patents planned, issued or pending                                                                           | <u>  ✓  </u> None |  |
| 9  | Participation on a Data Safety Monitoring Board or Advisory Board                                            | <u>  ✓  </u> None |  |
| 10 | Leadership or fiduciary role in other board, society, committee or advocacy group, paid or unpaid            | <u>  ✓  </u> None |  |
| 11 | Stock or stock options                                                                                       | <u>  ✓  </u> None |  |
| 12 | Receipt of equipment, materials, drugs, medical writing, gifts or other services                             | <u>  ✓  </u> None |  |
| 13 | Other financial or non-financial interests                                                                   | <u>  ✓  </u> None |  |

**Please summarize the above conflict of interest in the following box:**

This study was funded by the National Natural Science Foundation of China (grant number 81770759), the Major Project of Guangxi Innovation Driven (grant number AA18118016), the National Key Research and Development Program of China (grant number 2017YFC0908000) and the Guangxi key Laboratory for Genomic and Personalized Medicine (grant number 16-380-54, 17-259-45, 19-050-22, 19-185-33, 20-065-33).

**Please place an "X" next to the following statement to indicate your agreement:**

  X   I certify that I have answered every question and have not altered the wording of any of the questions on this form.

## ICMJE DISCLOSURE FORM

Date: April 19th, 2021

Your Name: Chengbang Wang

Manuscript Title: KCNN4 is a potential prognostic marker and critical factor affecting the immune status of the tumor microenvironment in kidney renal clear cell carcinoma

Manuscript number (if known): \_\_\_\_\_

In the interest of transparency, we ask you to disclose all relationships/activities/interests listed below that are related to the content of your manuscript. "Related" means any relation with for-profit or not-for-profit third parties whose interests may be affected by the content of the manuscript. Disclosure represents a commitment to transparency and does not necessarily indicate a bias. If you are in doubt about whether to list a relationship/activity/interest, it is preferable that you do so.

The following questions apply to the author's relationships/activities/interests as they relate to the current manuscript only.

The author's relationships/activities/interests should be defined broadly. For example, if your manuscript pertains to the epidemiology of hypertension, you should declare all relationships with manufacturers of antihypertensive medication, even if that medication is not mentioned in the manuscript.

In item #1 below, report all support for the work reported in this manuscript without time limit. For all other items, the time frame for disclosure is the past 36 months.

|                                                           |                                                                                                                                                                                | Name all entities with whom you have this relationship or indicate none (add rows as needed)                                      | Specifications/Comments (e.g., if payments were made to you or to your institution) |
|-----------------------------------------------------------|--------------------------------------------------------------------------------------------------------------------------------------------------------------------------------|-----------------------------------------------------------------------------------------------------------------------------------|-------------------------------------------------------------------------------------|
| <b>Time frame: Since the initial planning of the work</b> |                                                                                                                                                                                |                                                                                                                                   |                                                                                     |
| 1                                                         | All support for the present manuscript (e.g., funding, provision of study materials, medical writing, article processing charges, etc.)<br><b>No time limit for this item.</b> | National Natural Science Foundation of China (grant number 81770759)                                                              |                                                                                     |
|                                                           |                                                                                                                                                                                | National Key Research and Development Program of China (grant number 2017YFC0908000)                                              |                                                                                     |
|                                                           |                                                                                                                                                                                | Major Project of Guangxi Innovation Driven (grant number AA18118016)                                                              |                                                                                     |
|                                                           |                                                                                                                                                                                | Guangxi key Laboratory for Genomic and Personalized Medicine (grant number 16-380-54, 17-259-45, 19-050-22, 19-185-33, 20-065-33) |                                                                                     |
| <b>Time frame: past 36 months</b>                         |                                                                                                                                                                                |                                                                                                                                   |                                                                                     |
| 2                                                         | Grants or contracts from any entity (if not indicated)                                                                                                                         | <input checked="" type="checkbox"/> None                                                                                          |                                                                                     |

|    |                                                                                                              |                   |  |
|----|--------------------------------------------------------------------------------------------------------------|-------------------|--|
|    | in item #1 above).                                                                                           |                   |  |
| 3  | Royalties or licenses                                                                                        | <u>  ✓  </u> None |  |
| 4  | Consulting fees                                                                                              | <u>  ✓  </u> None |  |
| 5  | Payment or honoraria for lectures, presentations, speakers bureaus, manuscript writing or educational events | <u>  ✓  </u> None |  |
| 6  | Payment for expert testimony                                                                                 | <u>  ✓  </u> None |  |
| 7  | Support for attending meetings and/or travel                                                                 | <u>  ✓  </u> None |  |
| 8  | Patents planned, issued or pending                                                                           | <u>  ✓  </u> None |  |
| 9  | Participation on a Data Safety Monitoring Board or Advisory Board                                            | <u>  ✓  </u> None |  |
| 10 | Leadership or fiduciary role in other board, society, committee or advocacy group, paid or unpaid            | <u>  ✓  </u> None |  |
| 11 | Stock or stock options                                                                                       | <u>  ✓  </u> None |  |
| 12 | Receipt of equipment, materials, drugs, medical writing, gifts or other services                             | <u>  ✓  </u> None |  |
| 13 | Other financial or non-financial interests                                                                   | <u>  ✓  </u> None |  |

**Please summarize the above conflict of interest in the following box:**

This study was funded by the National Natural Science Foundation of China (grant number 81770759), the Major Project of Guangxi Innovation Driven (grant number AA18118016), the National Key Research and Development Program of China (grant number 2017YFC0908000) and the Guangxi key Laboratory for Genomic and Personalized Medicine (grant number 16-380-54, 17-259-45, 19-050-22, 19-185-33, 20-065-33).

**Please place an “X” next to the following statement to indicate your agreement:**

  X   I certify that I have answered every question and have not altered the wording of any of the questions on this form.

## ICMJE DISCLOSURE FORM

Date: April 19th, 2021

Your Name: Xiaotao Su

Manuscript Title: KCNN4 is a potential prognostic marker and critical factor affecting the immune status of the tumor microenvironment in kidney renal clear cell carcinoma

Manuscript number (if known): \_\_\_\_\_

In the interest of transparency, we ask you to disclose all relationships/activities/interests listed below that are related to the content of your manuscript. "Related" means any relation with for-profit or not-for-profit third parties whose interests may be affected by the content of the manuscript. Disclosure represents a commitment to transparency and does not necessarily indicate a bias. If you are in doubt about whether to list a relationship/activity/interest, it is preferable that you do so.

The following questions apply to the author's relationships/activities/interests as they relate to the current manuscript only.

The author's relationships/activities/interests should be defined broadly. For example, if your manuscript pertains to the epidemiology of hypertension, you should declare all relationships with manufacturers of antihypertensive medication, even if that medication is not mentioned in the manuscript.

In item #1 below, report all support for the work reported in this manuscript without time limit. For all other items, the time frame for disclosure is the past 36 months.

|                                                           |                                                                                                                                                                                | Name all entities with whom you have this relationship or indicate none (add rows as needed)                                      | Specifications/Comments (e.g., if payments were made to you or to your institution) |
|-----------------------------------------------------------|--------------------------------------------------------------------------------------------------------------------------------------------------------------------------------|-----------------------------------------------------------------------------------------------------------------------------------|-------------------------------------------------------------------------------------|
| <b>Time frame: Since the initial planning of the work</b> |                                                                                                                                                                                |                                                                                                                                   |                                                                                     |
| 1                                                         | All support for the present manuscript (e.g., funding, provision of study materials, medical writing, article processing charges, etc.)<br><b>No time limit for this item.</b> | National Natural Science Foundation of China (grant number 81770759)                                                              |                                                                                     |
|                                                           |                                                                                                                                                                                | National Key Research and Development Program of China (grant number 2017YFC0908000)                                              |                                                                                     |
|                                                           |                                                                                                                                                                                | Major Project of Guangxi Innovation Driven (grant number AA18118016)                                                              |                                                                                     |
|                                                           |                                                                                                                                                                                | Guangxi key Laboratory for Genomic and Personalized Medicine (grant number 16-380-54, 17-259-45, 19-050-22, 19-185-33, 20-065-33) |                                                                                     |
| <b>Time frame: past 36 months</b>                         |                                                                                                                                                                                |                                                                                                                                   |                                                                                     |
| 2                                                         | Grants or contracts from any entity (if not indicated)                                                                                                                         | <input checked="" type="checkbox"/> None                                                                                          |                                                                                     |

|    |                                                                                                              |                   |  |
|----|--------------------------------------------------------------------------------------------------------------|-------------------|--|
|    | in item #1 above).                                                                                           |                   |  |
| 3  | Royalties or licenses                                                                                        | <u>  ✓  </u> None |  |
| 4  | Consulting fees                                                                                              | <u>  ✓  </u> None |  |
| 5  | Payment or honoraria for lectures, presentations, speakers bureaus, manuscript writing or educational events | <u>  ✓  </u> None |  |
| 6  | Payment for expert testimony                                                                                 | <u>  ✓  </u> None |  |
| 7  | Support for attending meetings and/or travel                                                                 | <u>  ✓  </u> None |  |
| 8  | Patents planned, issued or pending                                                                           | <u>  ✓  </u> None |  |
| 9  | Participation on a Data Safety Monitoring Board or Advisory Board                                            | <u>  ✓  </u> None |  |
| 10 | Leadership or fiduciary role in other board, society, committee or advocacy group, paid or unpaid            | <u>  ✓  </u> None |  |
| 11 | Stock or stock options                                                                                       | <u>  ✓  </u> None |  |
| 12 | Receipt of equipment, materials, drugs, medical writing, gifts or other services                             | <u>  ✓  </u> None |  |
| 13 | Other financial or non-financial interests                                                                   | <u>  ✓  </u> None |  |

**Please summarize the above conflict of interest in the following box:**

This study was funded by the National Natural Science Foundation of China (grant number 81770759), the Major Project of Guangxi Innovation Driven (grant number AA18118016), the National Key Research and Development Program of China (grant number 2017YFC0908000) and the Guangxi key Laboratory for Genomic and Personalized Medicine (grant number 16-380-54, 17-259-45, 19-050-22, 19-185-33, 20-065-33).

**Please place an "X" next to the following statement to indicate your agreement:**

  X   I certify that I have answered every question and have not altered the wording of any of the questions on this form.

## ICMJE DISCLOSURE FORM

Date: April 19th, 2021

Your Name: Xiaodi Dai

Manuscript Title: KCNN4 is a potential prognostic marker and critical factor affecting the immune status of the tumor microenvironment in kidney renal clear cell carcinoma

Manuscript number (if known): \_\_\_\_\_

In the interest of transparency, we ask you to disclose all relationships/activities/interests listed below that are related to the content of your manuscript. "Related" means any relation with for-profit or not-for-profit third parties whose interests may be affected by the content of the manuscript. Disclosure represents a commitment to transparency and does not necessarily indicate a bias. If you are in doubt about whether to list a relationship/activity/interest, it is preferable that you do so.

The following questions apply to the author's relationships/activities/interests as they relate to the current manuscript only.

The author's relationships/activities/interests should be defined broadly. For example, if your manuscript pertains to the epidemiology of hypertension, you should declare all relationships with manufacturers of antihypertensive medication, even if that medication is not mentioned in the manuscript.

In item #1 below, report all support for the work reported in this manuscript without time limit. For all other items, the time frame for disclosure is the past 36 months.

|                                                           |                                                                                                                                                                                | Name all entities with whom you have this relationship or indicate none (add rows as needed)                                      | Specifications/Comments (e.g., if payments were made to you or to your institution) |
|-----------------------------------------------------------|--------------------------------------------------------------------------------------------------------------------------------------------------------------------------------|-----------------------------------------------------------------------------------------------------------------------------------|-------------------------------------------------------------------------------------|
| <b>Time frame: Since the initial planning of the work</b> |                                                                                                                                                                                |                                                                                                                                   |                                                                                     |
| 1                                                         | All support for the present manuscript (e.g., funding, provision of study materials, medical writing, article processing charges, etc.)<br><b>No time limit for this item.</b> | National Natural Science Foundation of China (grant number 81770759)                                                              |                                                                                     |
|                                                           |                                                                                                                                                                                | National Key Research and Development Program of China (grant number 2017YFC0908000)                                              |                                                                                     |
|                                                           |                                                                                                                                                                                | Major Project of Guangxi Innovation Driven (grant number AA18118016)                                                              |                                                                                     |
|                                                           |                                                                                                                                                                                | Guangxi key Laboratory for Genomic and Personalized Medicine (grant number 16-380-54, 17-259-45, 19-050-22, 19-185-33, 20-065-33) |                                                                                     |
| <b>Time frame: past 36 months</b>                         |                                                                                                                                                                                |                                                                                                                                   |                                                                                     |
| 2                                                         | Grants or contracts from any entity (if not indicated)                                                                                                                         | <input checked="" type="checkbox"/> None                                                                                          |                                                                                     |

|    |                                                                                                              |                   |  |
|----|--------------------------------------------------------------------------------------------------------------|-------------------|--|
|    | in item #1 above).                                                                                           |                   |  |
| 3  | Royalties or licenses                                                                                        | <u>  ✓  </u> None |  |
| 4  | Consulting fees                                                                                              | <u>  ✓  </u> None |  |
| 5  | Payment or honoraria for lectures, presentations, speakers bureaus, manuscript writing or educational events | <u>  ✓  </u> None |  |
| 6  | Payment for expert testimony                                                                                 | <u>  ✓  </u> None |  |
| 7  | Support for attending meetings and/or travel                                                                 | <u>  ✓  </u> None |  |
| 8  | Patents planned, issued or pending                                                                           | <u>  ✓  </u> None |  |
| 9  | Participation on a Data Safety Monitoring Board or Advisory Board                                            | <u>  ✓  </u> None |  |
| 10 | Leadership or fiduciary role in other board, society, committee or advocacy group, paid or unpaid            | <u>  ✓  </u> None |  |
| 11 | Stock or stock options                                                                                       | <u>  ✓  </u> None |  |
| 12 | Receipt of equipment, materials, drugs, medical writing, gifts or other services                             | <u>  ✓  </u> None |  |
| 13 | Other financial or non-financial interests                                                                   | <u>  ✓  </u> None |  |

**Please summarize the above conflict of interest in the following box:**

This study was funded by the National Natural Science Foundation of China (grant number 81770759), the Major Project of Guangxi Innovation Driven (grant number AA18118016), the National Key Research and Development Program of China (grant number 2017YFC0908000) and the Guangxi key Laboratory for Genomic and Personalized Medicine (grant number 16-380-54, 17-259-45, 19-050-22, 19-185-33, 20-065-33).

**Please place an “X” next to the following statement to indicate your agreement:**

  X   I certify that I have answered every question and have not altered the wording of any of the questions on this form.



## ICMJE DISCLOSURE FORM

Date: April 19th, 2021

Your Name: Songheng Li

Manuscript Title: KCNN4 is a potential prognostic marker and critical factor affecting the immune status of the tumor microenvironment in kidney renal clear cell carcinoma

Manuscript number (if known): \_\_\_\_\_

In the interest of transparency, we ask you to disclose all relationships/activities/interests listed below that are related to the content of your manuscript. "Related" means any relation with for-profit or not-for-profit third parties whose interests may be affected by the content of the manuscript. Disclosure represents a commitment to transparency and does not necessarily indicate a bias. If you are in doubt about whether to list a relationship/activity/interest, it is preferable that you do so.

The following questions apply to the author's relationships/activities/interests as they relate to the current manuscript only.

The author's relationships/activities/interests should be defined broadly. For example, if your manuscript pertains to the epidemiology of hypertension, you should declare all relationships with manufacturers of antihypertensive medication, even if that medication is not mentioned in the manuscript.

In item #1 below, report all support for the work reported in this manuscript without time limit. For all other items, the time frame for disclosure is the past 36 months.

|                                                           |                                                                                                                                                                                | Name all entities with whom you have this relationship or indicate none (add rows as needed)                                      | Specifications/Comments (e.g., if payments were made to you or to your institution) |
|-----------------------------------------------------------|--------------------------------------------------------------------------------------------------------------------------------------------------------------------------------|-----------------------------------------------------------------------------------------------------------------------------------|-------------------------------------------------------------------------------------|
| <b>Time frame: Since the initial planning of the work</b> |                                                                                                                                                                                |                                                                                                                                   |                                                                                     |
| 1                                                         | All support for the present manuscript (e.g., funding, provision of study materials, medical writing, article processing charges, etc.)<br><b>No time limit for this item.</b> | National Natural Science Foundation of China (grant number 81770759)                                                              |                                                                                     |
|                                                           |                                                                                                                                                                                | National Key Research and Development Program of China (grant number 2017YFC0908000)                                              |                                                                                     |
|                                                           |                                                                                                                                                                                | Major Project of Guangxi Innovation Driven (grant number AA18118016)                                                              |                                                                                     |
|                                                           |                                                                                                                                                                                | Guangxi key Laboratory for Genomic and Personalized Medicine (grant number 16-380-54, 17-259-45, 19-050-22, 19-185-33, 20-065-33) |                                                                                     |
| <b>Time frame: past 36 months</b>                         |                                                                                                                                                                                |                                                                                                                                   |                                                                                     |
| 2                                                         | Grants or contracts from any entity (if not indicated)                                                                                                                         | <input checked="" type="checkbox"/> None                                                                                          |                                                                                     |

|    |                                                                                                              |                   |  |
|----|--------------------------------------------------------------------------------------------------------------|-------------------|--|
|    | in item #1 above).                                                                                           |                   |  |
| 3  | Royalties or licenses                                                                                        | <u>  ✓  </u> None |  |
| 4  | Consulting fees                                                                                              | <u>  ✓  </u> None |  |
| 5  | Payment or honoraria for lectures, presentations, speakers bureaus, manuscript writing or educational events | <u>  ✓  </u> None |  |
| 6  | Payment for expert testimony                                                                                 | <u>  ✓  </u> None |  |
| 7  | Support for attending meetings and/or travel                                                                 | <u>  ✓  </u> None |  |
| 8  | Patents planned, issued or pending                                                                           | <u>  ✓  </u> None |  |
| 9  | Participation on a Data Safety Monitoring Board or Advisory Board                                            | <u>  ✓  </u> None |  |
| 10 | Leadership or fiduciary role in other board, society, committee or advocacy group, paid or unpaid            | <u>  ✓  </u> None |  |
| 11 | Stock or stock options                                                                                       | <u>  ✓  </u> None |  |
| 12 | Receipt of equipment, materials, drugs, medical writing, gifts or other services                             | <u>  ✓  </u> None |  |
| 13 | Other financial or non-financial interests                                                                   | <u>  ✓  </u> None |  |

**Please summarize the above conflict of interest in the following box:**

This study was funded by the National Natural Science Foundation of China (grant number 81770759), the Major Project of Guangxi Innovation Driven (grant number AA18118016), the National Key Research and Development Program of China (grant number 2017YFC0908000) and the Guangxi key Laboratory for Genomic and Personalized Medicine (grant number 16-380-54, 17-259-45, 19-050-22, 19-185-33, 20-065-33).

**Please place an "X" next to the following statement to indicate your agreement:**

  X   I certify that I have answered every question and have not altered the wording of any of the questions on this form.

## ICMJE DISCLOSURE FORM

Date: April 19th, 2021

Your Name: Zengnan Mo

Manuscript Title: KCNN4 is a potential prognostic marker and critical factor affecting the immune status of the tumor microenvironment in kidney renal clear cell carcinoma

Manuscript number (if known): \_\_\_\_\_

In the interest of transparency, we ask you to disclose all relationships/activities/interests listed below that are related to the content of your manuscript. "Related" means any relation with for-profit or not-for-profit third parties whose interests may be affected by the content of the manuscript. Disclosure represents a commitment to transparency and does not necessarily indicate a bias. If you are in doubt about whether to list a relationship/activity/interest, it is preferable that you do so.

The following questions apply to the author's relationships/activities/interests as they relate to the current manuscript only.

The author's relationships/activities/interests should be defined broadly. For example, if your manuscript pertains to the epidemiology of hypertension, you should declare all relationships with manufacturers of antihypertensive medication, even if that medication is not mentioned in the manuscript.

In item #1 below, report all support for the work reported in this manuscript without time limit. For all other items, the time frame for disclosure is the past 36 months.

|                                                           |                                                                                                                                                                                | Name all entities with whom you have this relationship or indicate none (add rows as needed)                                      | Specifications/Comments (e.g., if payments were made to you or to your institution) |
|-----------------------------------------------------------|--------------------------------------------------------------------------------------------------------------------------------------------------------------------------------|-----------------------------------------------------------------------------------------------------------------------------------|-------------------------------------------------------------------------------------|
| <b>Time frame: Since the initial planning of the work</b> |                                                                                                                                                                                |                                                                                                                                   |                                                                                     |
| 1                                                         | All support for the present manuscript (e.g., funding, provision of study materials, medical writing, article processing charges, etc.)<br><b>No time limit for this item.</b> | National Natural Science Foundation of China (grant number 81770759)                                                              |                                                                                     |
|                                                           |                                                                                                                                                                                | National Key Research and Development Program of China (grant number 2017YFC0908000)                                              |                                                                                     |
|                                                           |                                                                                                                                                                                | Major Project of Guangxi Innovation Driven (grant number AA18118016)                                                              |                                                                                     |
|                                                           |                                                                                                                                                                                | Guangxi key Laboratory for Genomic and Personalized Medicine (grant number 16-380-54, 17-259-45, 19-050-22, 19-185-33, 20-065-33) |                                                                                     |
| <b>Time frame: past 36 months</b>                         |                                                                                                                                                                                |                                                                                                                                   |                                                                                     |
| 2                                                         | Grants or contracts from any entity (if not indicated)                                                                                                                         | <input checked="" type="checkbox"/> None                                                                                          |                                                                                     |

|    |                                                                                                              |                                          |  |
|----|--------------------------------------------------------------------------------------------------------------|------------------------------------------|--|
|    | in item #1 above).                                                                                           |                                          |  |
| 3  | Royalties or licenses                                                                                        | <input checked="" type="checkbox"/> None |  |
| 4  | Consulting fees                                                                                              | <input checked="" type="checkbox"/> None |  |
| 5  | Payment or honoraria for lectures, presentations, speakers bureaus, manuscript writing or educational events | <input checked="" type="checkbox"/> None |  |
| 6  | Payment for expert testimony                                                                                 | <input checked="" type="checkbox"/> None |  |
| 7  | Support for attending meetings and/or travel                                                                 | <input checked="" type="checkbox"/> None |  |
| 8  | Patents planned, issued or pending                                                                           | <input checked="" type="checkbox"/> None |  |
| 9  | Participation on a Data Safety Monitoring Board or Advisory Board                                            | <input checked="" type="checkbox"/> None |  |
| 10 | Leadership or fiduciary role in other board, society, committee or advocacy group, paid or unpaid            | <input checked="" type="checkbox"/> None |  |
| 11 | Stock or stock options                                                                                       | <input checked="" type="checkbox"/> None |  |
| 12 | Receipt of equipment, materials, drugs, medical writing, gifts or other services                             | <input checked="" type="checkbox"/> None |  |
| 13 | Other financial or non-financial interests                                                                   | <input checked="" type="checkbox"/> None |  |

**Please summarize the above conflict of interest in the following box:**

This study was funded by the National Natural Science Foundation of China (grant number 81770759), the Major Project of Guangxi Innovation Driven (grant number AA18118016), the National Key Research and Development Program of China (grant number 2017YFC0908000) and the Guangxi key Laboratory for Genomic and Personalized Medicine (grant number 16-380-54, 17-259-45, 19-050-22, 19-185-33, 20-065-33).

**Please place an "X" next to the following statement to indicate your agreement:**

I certify that I have answered every question and have not altered the wording of any of the questions on this form.
