# Supplementary material for: KCNN4 is a potential prognostic marker and critical factor affecting the immune status of the tumor microenvironment in kidney renal clear cell carcinoma
Source: PubMed Central journal article supplement — Transl Androl Urol. 2021 Jun;10(6):2454–70. doi: 10.21037/tau-21-332 (PMC8261455; doi:10.21037/tau-21-332), 2021-06
Supplement: tau-10-06-2454-dss.pdf [file tau-10-06-2454-dss.pdf]

## Data Sharing Statement

|                     |                                                                                                                                                     |                                                                                                                 |
|---------------------|-----------------------------------------------------------------------------------------------------------------------------------------------------|-----------------------------------------------------------------------------------------------------------------|
| <b>Article Info</b> | <a href="http://dx.doi.org/10.21037/tau-21-332">http://dx.doi.org/10.21037/tau-21-332</a>                                                           |                                                                                                                 |
| <b>Item</b>         | <b>Question</b>                                                                                                                                     | <b>Authors' Response<br/>(place "-" if not applicable)</b>                                                      |
| 1                   | Would you like to share data collected for your study to others?                                                                                    | Yes.                                                                                                            |
| 2                   | If not, would you like to share the reason for your decision?                                                                                       | -                                                                                                               |
| 3                   | What data in particular will be shared?                                                                                                             | We will share the patients' information and the original data of PCR and WB in the article.                     |
| 4                   | Any other documents will be shared? Such as study protocol, statistical analysis plan, informed consent form, clinical study report, analytic code. | Statistical analysis plan, informed consent form, and clinical study report will also be shared if requested.   |
| 5                   | When will data availability begin?                                                                                                                  | From the publication date.                                                                                      |
| 6                   | When will data availability end?                                                                                                                    | Two years within the publication date.                                                                          |
| 7                   | To whom will you share the data?                                                                                                                    | Medical oncologists and urology surgeons who are interested in studies of kidney cancer.                        |
| 8                   | For what type of analysis or purpose?                                                                                                               | For analysis to evaluate the biomarker of kidney cancer patients.                                               |
| 9                   | How or where can the data/documents be obtained?                                                                                                    | Emails could be sent to the address below to obtain the shared data:<br>silverchan1994@163.com                  |
| 10                  | Any other restrictions?                                                                                                                             | We may balance the potential benefits and risks for each request and then provide the data that could be shared |
